# Supplementary material for: Characterization and prognostic value of LXR splice variants in triple-negative breast cancer
Source: PubMed Central journal article supplement — iScience. 2021 Oct 2;24(10):103212. doi: 10.1016/j.isci.2021.103212 (PMC8560626; doi:10.1016/j.isci.2021.103212), 2021-10-02
Supplement: mmc1.pdf [file mmc1.pdf]

**iScience, Volume 24**

**Supplemental information**

**Characterization and prognostic value of LXR  
splice variants in triple-negative breast cancer**

**Priscilia Lianto, Samantha A. Hutchinson, J. Bernadette Moore, Thomas A. Hughes, and James L. Thorne**

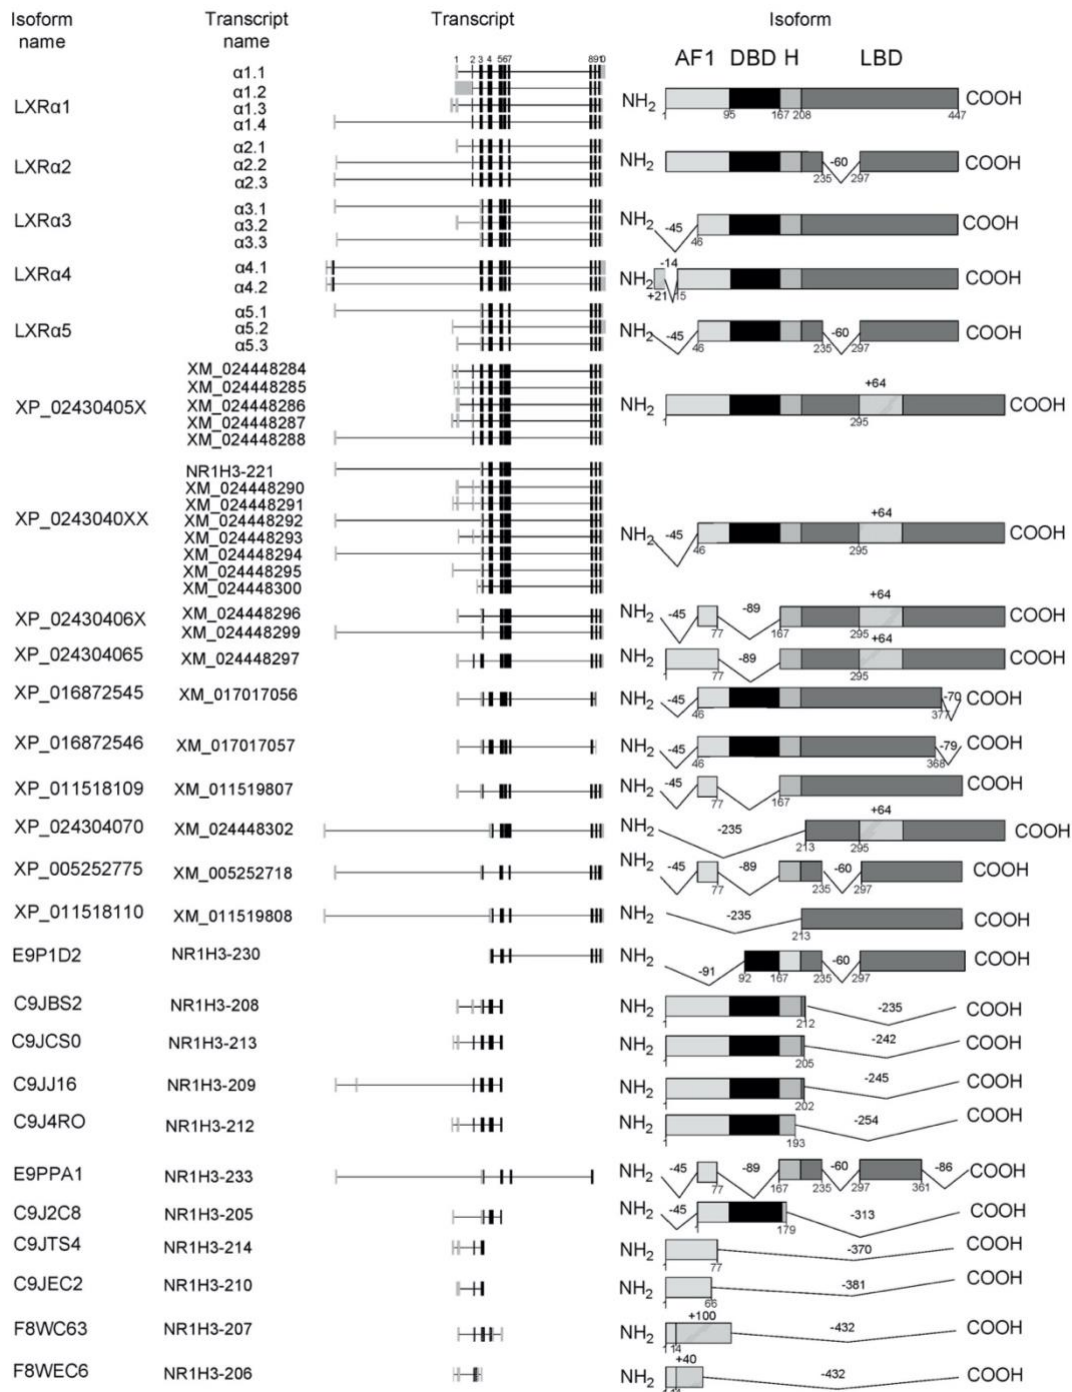

**Supplementary Figure 1. Schematic diagram of LXRα splice variants. Related to Figure 1.** LXRα splice variants reported in NCBI, ENSEMBL, and/or UNIPROT databases. For transcript, black boxes represent translated exons, grey boxes represent untranslated exons, lines joining exons represent intronic regions. Silver boxes show Activation Function 1 (AF1), black boxes are represented DNA Binding Domain (DBD), light grey are represented hinge (H), and dark grey boxes are represented Ligand Binding Domain (LBD). The numbers below the isoform domain boxes represent the position of amino acids. The hatched boxes represent protein domain derived from later-discovered coding exon. The numbers above connecting lines represent missing amino acids.

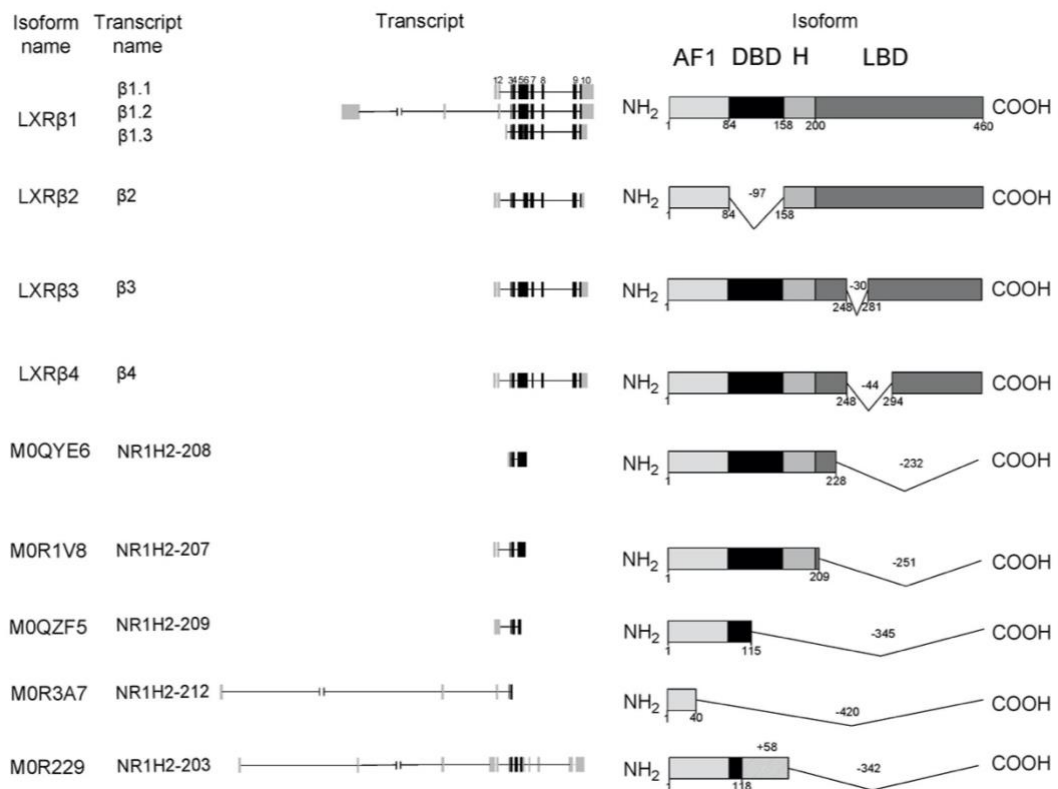

**Supplementary Figure 2. Schematic diagram of LXRβ splice variants. Related to Figure 1.** LXRβ splice variants reported in NCBI, ENSEMBL, and/or UNIPROT databases. For transcript, black boxes represent translated exons, grey boxes represent untranslated exons, lines joining exons represent intronic regions. For isoform, silver boxes are represented Activation Function 1 (AF1), black boxes represent DNA Binding Domain (DBD), light grey represent hinge (H), and dark grey boxes represent Ligand Binding Domain (LBD). The numbers right below the isoform domain boxes represent the position of amino acids. The hatched boxes are represented protein domain derived from later-discovered coding exon. The numbers above connecting lines represent missing amino acids.

### Previous Studies' Primer Design

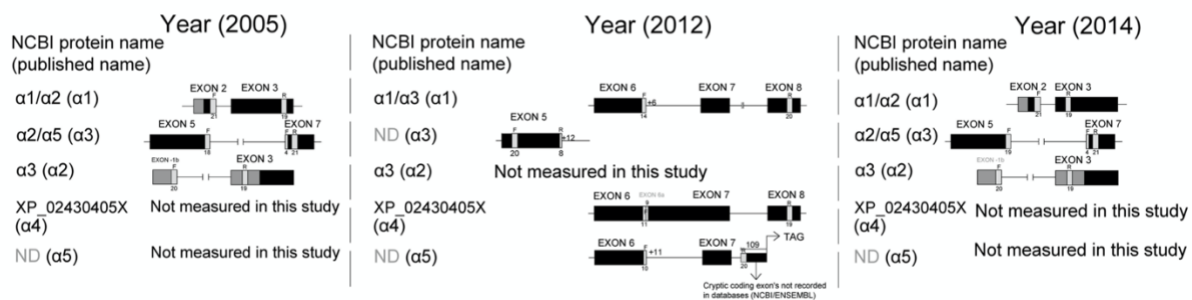

**Supplementary Figure 3: Schematic diagrams illustrating the location of primer pairs for detecting LXR splice variants in previous studies. Related to Figure 1. ND = transcript not documented in any database.**

# LXR $\alpha$

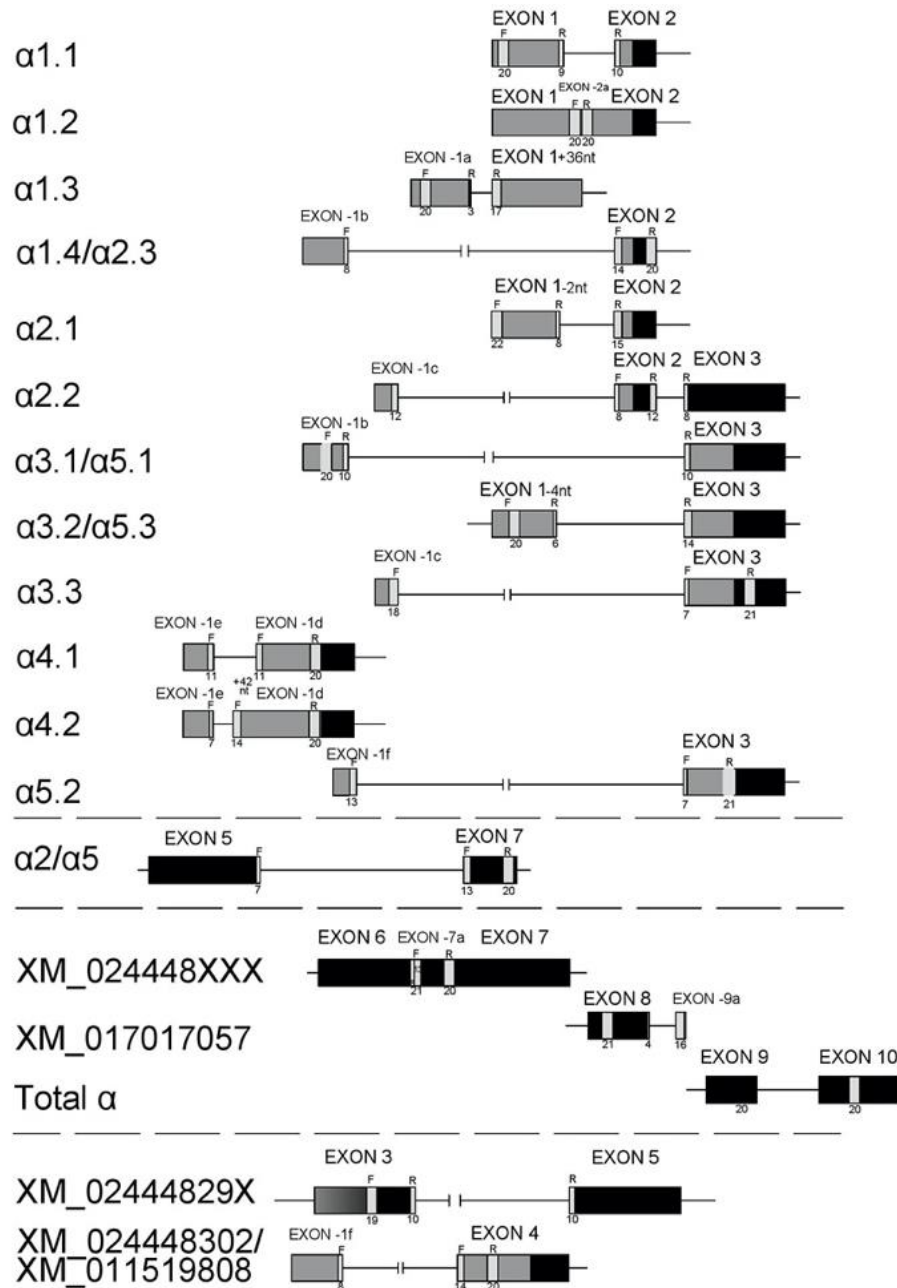

**Supplementary Figure 4: Schematic diagrams illustrating the location of primer pairs for detecting LXR $\alpha$  splice variants in the current study. Related to Figure 1.** The grey boxes show non-coding exons; the black boxes show coding exons; the lines connecting boxes denote introns; the grey text (e.g., for exon 3 of XM\_024448XXX isoforms) indicated that exon 7a can be either coding or non-coding exon. The numeral X in transcript names (e.g. XM\_02444829X or XM\_024448XXX) denotes multiple variants share these features in NCBI as Ref. Seq. ID. Location of primers is denoted by grey boxes with F (forward) and R (reverse) above and base number below. Primers split between exons have number of bases to which the primers bind on each side of the boundary.

# LXR $\beta$

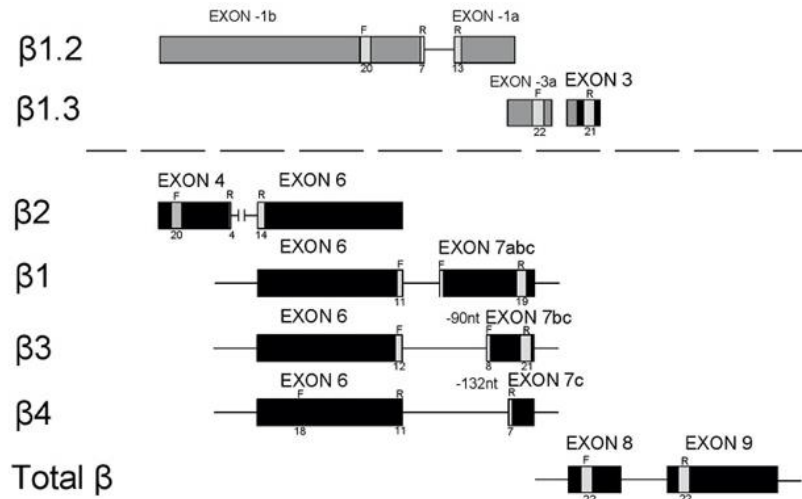

**Supplementary Figure 5: Schematic diagrams illustrating the location of primer pairs for detecting LXR $\beta$  splice variants in the current study. Related to Figure 1.** The grey boxes show non-coding exons; the black boxes show coding exons; the lines connecting boxes denote introns. Location of primers is denoted by grey boxes with F (forward) and R (reverse) primers above and size in bases below. Primers split between exons have number of bases to which the primers bind on each side of the boundary. ND = transcript not documented in any database.

CLUSTAL O(1.2.4) multiple sequence alignment

```

α1(NP_005684.2)          MSLWLGAPVPDIPPPDSAVELWKPGAQDASSQAQGGSSCILREEARMPHSAGGTAGVGLA 60
αx5(XP_011518107.1,XP_005252763.1) MSLWLGAPVPDIPPPDSAVELWKPGAQDASSQAQGGSSCILREEARMPHSAGGTAGVGLA 60
*****

α1(NP_005684.2)          AEPTALLTRAEPPEPTEIRPQKRKKGPAKMLGNELCSVCGDKASGFHYNVLSCEGCKG 120
αx5(XP_011518107.1,XP_005252763.1) AEPTALLTRAEPPEPTEIRPQKRKKGPAKMLGNELCSVCGDKASGFHYNVLSCEGCKG 120
*****

α1(NP_005684.2)          FFRRSVIKGAHYICHSGGHCPMDTYMRRKQCECLRKRQAGMREECVLSSEQIRLKKLK 180
αx5(XP_011518107.1,XP_005252763.1) FFRRSVIKGAHYICHSGGHCPMDTYMRRKQCECLRKRQAGMREECVLSSEQIRLKKLK 180
*****

α1(NP_005684.2)          RQEEQAHATSLPPRASSPPQILPQLSPEQLGMIEKLVAAQQCCNRRSFSDDLRLVTPWPM 240
αx5(XP_011518107.1,XP_005252763.1) RQEEQAHATSLPPRASSPPQILPQLSPEQLGMIEKLVAAQQCCNRRSFSDDLRLVTPWPM 240
*****

α1(NP_005684.2)          APDPHSREARQQRFAHPTELAI VSVQEI VDFAKQLPGFLQLSREDQIALLKTS AIEVMLL 300
αx5(XP_011518107.1,XP_005252763.1) APDPHSREARQQRFAHPTELAI VSVQEI VDFAKQLPGFLQLSREDQIALLKTS AIEVMLL 300
*****

α1(NP_005684.2)          ETSRRYNPGSEITFLKDFSYNREDFAKAGLQVEFINPIFEFSRAMNELQLNDAEFALLI 360
αx5(XP_011518107.1,XP_005252763.1) ETSRRYNPGSEITFLKDFSYNREDFAKAGLQVEFINPIFEFSRAMNELQLNDAEFALLI 360
*****

α1(NP_005684.2)          AISIFSADRPNVQDQLQVERLQHTYVEALHAYVSIHHPHDLRMFPRMLMCLVSLRTLSSV 420
αx5(XP_011518107.1,XP_005252763.1) AISIFSADRPNVQDQLQVERLQHTYVEALHAYVSIHHPHDLRMFPRMLMCLVSLRTLSSV 420
*****

α1(NP_005684.2)          HSEQVFALRLQDKKLPPLLSEIWDVHE 447
αx5(XP_011518107.1,XP_005252763.1) HSEQVFALRLQDKKLPPLLSEIWDVHE 447
*****

```

**Supplementary Figure 6. NCBI predicted ( $\alpha 1$ ) and curated (ax5) isoforms are fully homologous. Related to Figure 1.**

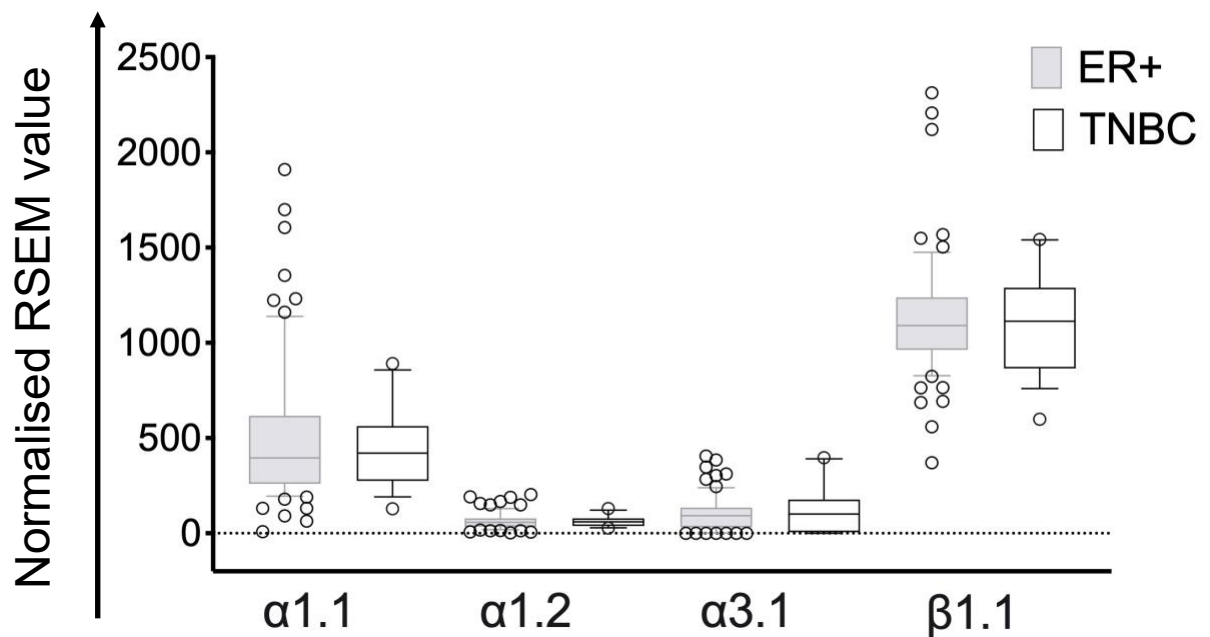

**Supplementary Figure 7. LXR transcript variant expression in ER+ and TNBC tumour samples from the TSVdb TCGA tumour cohort. Related to Figure 2.** Differential expression of LXR transcript variants in ER+ and TNBC tumour samples were plotted in box and whisker charts. The box extends from the 10th to 90th percentile. The line in the middle of the box shows median. The whiskers show minimum and maximum values. Significance was considered when  $p \leq 0.05$ .



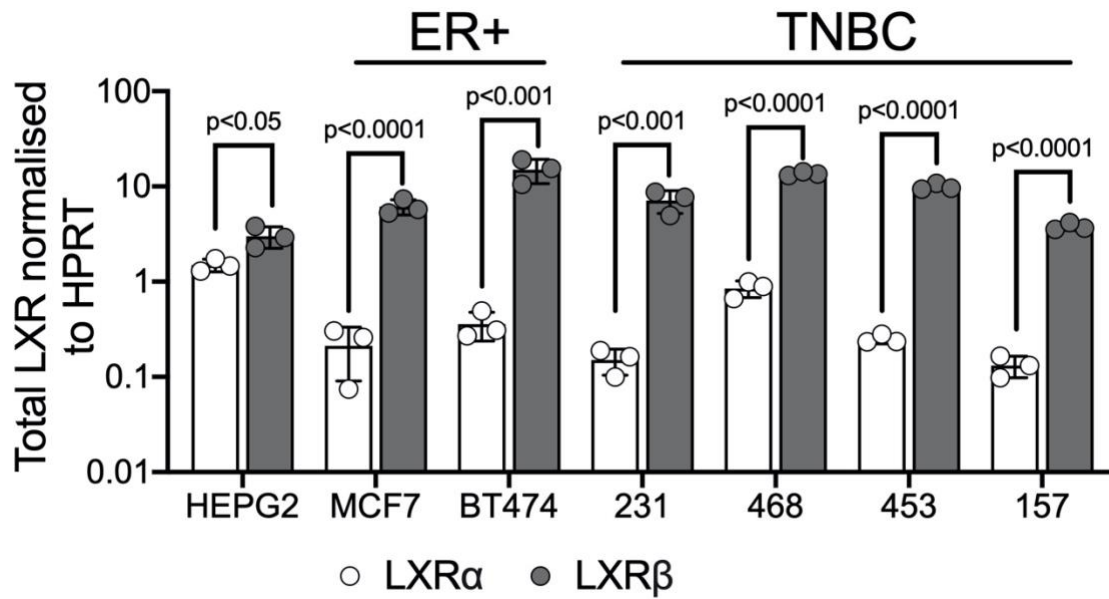

**Supplementary Figure 8. LXRβ is expressed at higher levels than LXRα in all breast cancer cell lines. Related to Figure 3.** Data showed mean of three independent replicates with SEM. p-values calculated using multiple two-way t-tests. Significance was considered when  $p \leq 0.05$ .

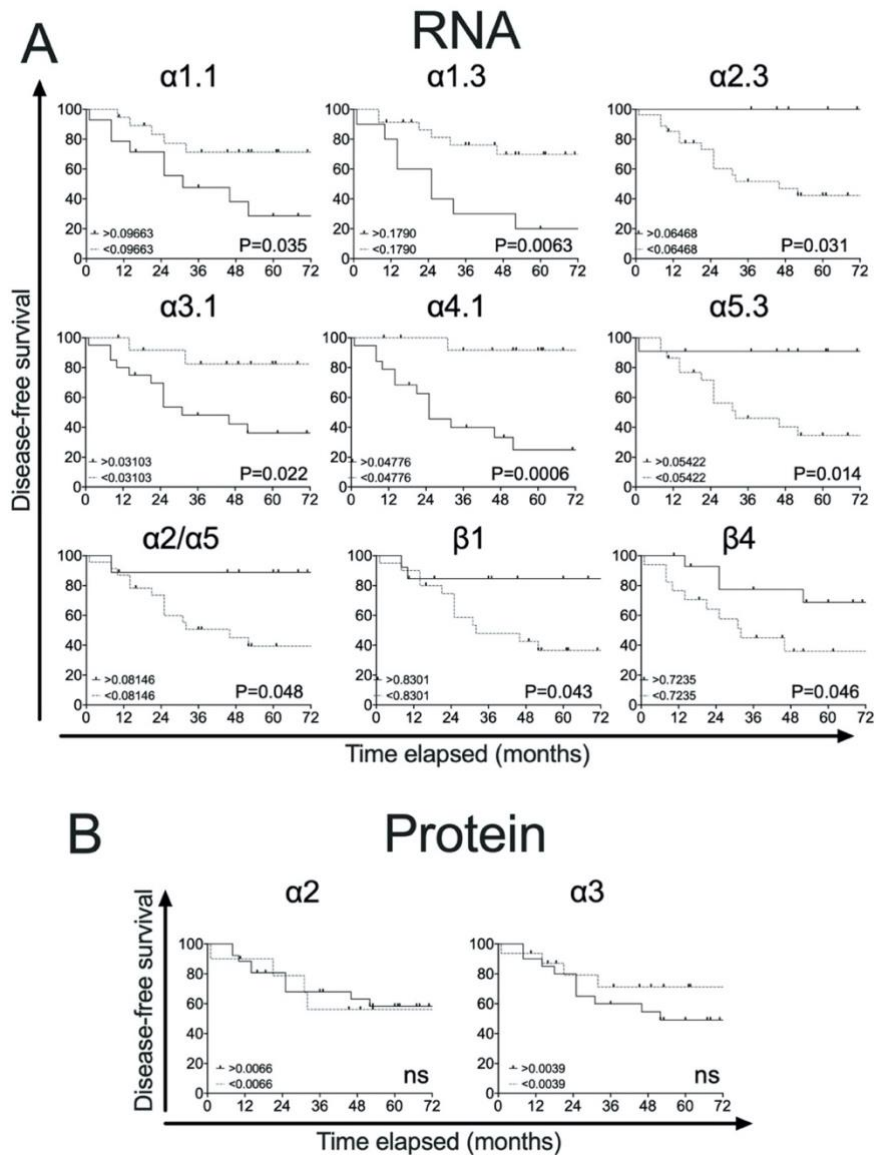

**Supplementary Figure 9. Splice variants and TNBC patient survival. Related to Figure 4.** (A) All transcript variants are prognostic. (B) LXRα2 and α3 protein variants are not prognostic. TNBC patients were divided into two groups (n=38), no event (n=23) and event (n=15), based on their disease-free survival status. Kaplan-Meier survival curves plotting disease free survival of TNBC patients with high or low variant expression relative to HPRT. Data derived from the mean of two different slices of tumours. Significance determined by the Log-rank (Mantel-cox) test,  $p \leq 0.05$  was considered significant.

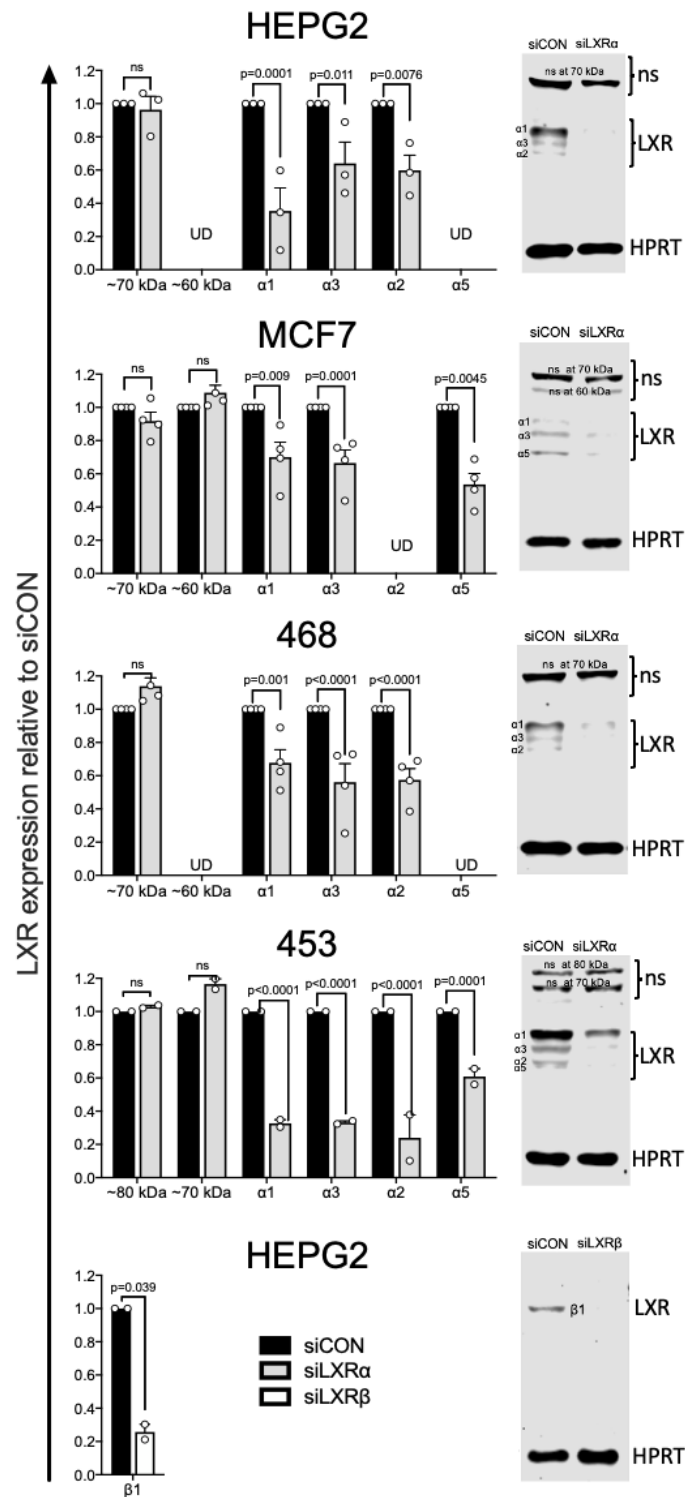

**Supplementary Figure 10. Relative expression LXR protein variants in siLXRα relative siRNA control. Related to Figure 3.** Protein expression determined in ImageJ. Data represent mean of 2-4 independent replicates with SEM. Additional bands at 60kDa and 70kDa were assumed to be non-specific (ns) as their sizes did not correspond to any of the 48 LXR $\alpha$  transcripts. As expected, non-specific bands were unaffected by siRNA treatment. Statistical significance was measured by two-tailed one-way ANOVA, p-values are given above bars showing significant difference compared to siCON. siCON = siControl.

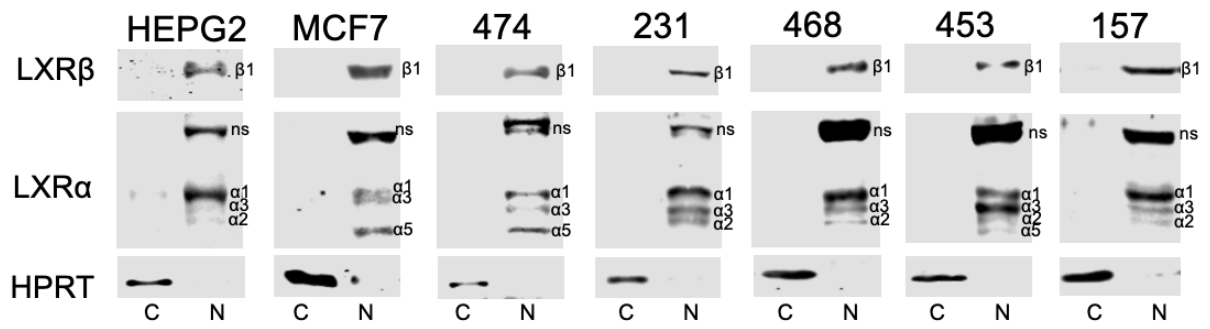

**Supplementary Figure 11. All LXR splice variants are localized in nucleus. Related to Figure 3.** HPRT is used as cytoplasmic loading control. ns = non-specific binding; C=cytoplasmic; N=nuclear.

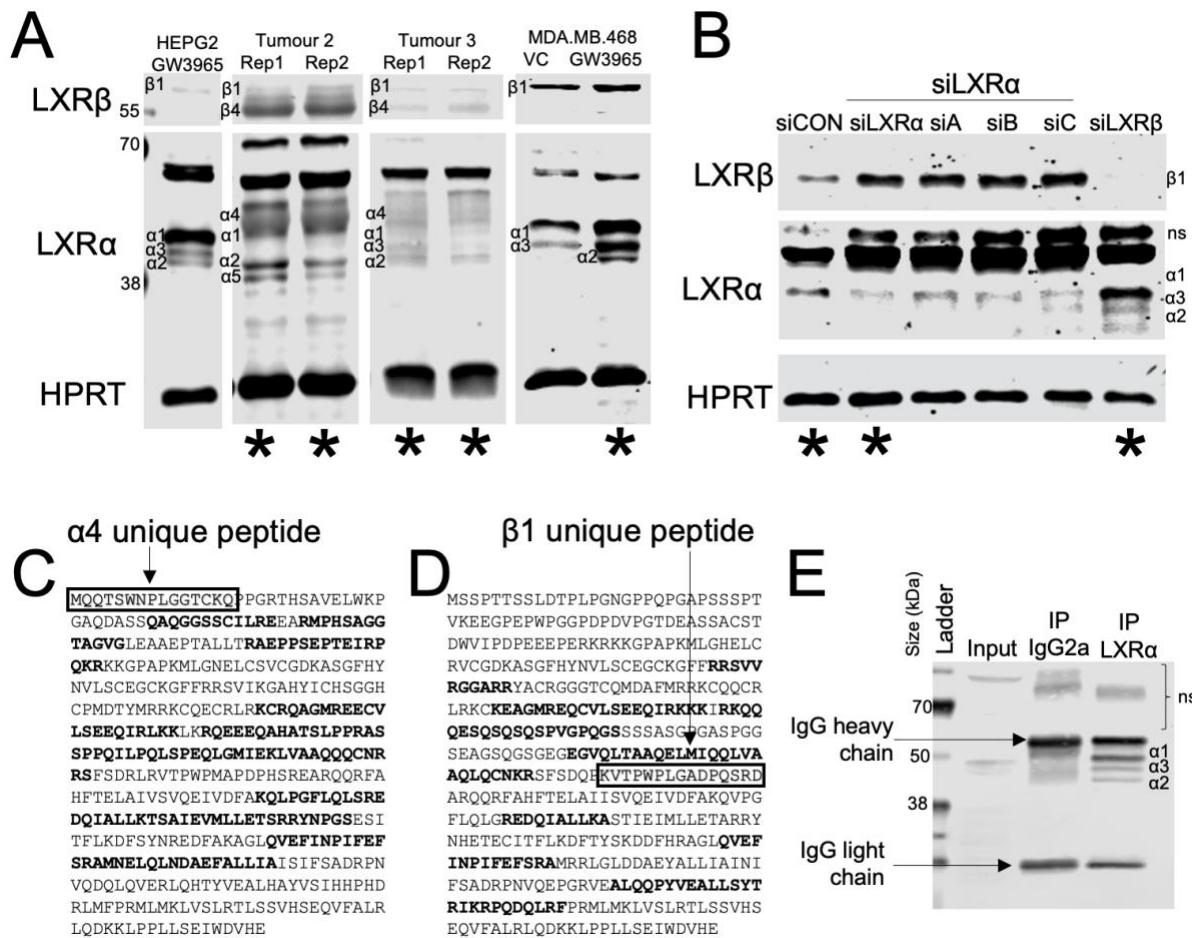

**Supplementary Figure 12. Representative blots showing the LXR splicing protein expression in samples subjected to Mass-Spectrometry (MS). Related to Table 1, Table 2, and Table 3. (A) TNBC tumours and in MDA.MB.468 cell line samples treated with GW3965, siLXRα or siLXRβ treated MDA.MB.468 cells. Samples marked with asterix were subjected to mass spectrometry (MS) analysis. Sequence coverage of unique (boxes) or homologous (bold) peptides LXRα (C) and LXRβ (D) peptides identified by proteomic analysis. Homologous peptides are generated by multiple LXR splice variants and can't be used to confirm the presence or individual variants. (E) MDA.MB.468 subjected to immunoprecipitation. VC = vehicle control; T = tumour; siA = siExon4 of LXRα, siB = siExon9-10 (coding exon) of LXRα, siC = siExon10 (non-coding 3'UTR) of LXRα, siLXRα = siA+siB+siC. ns = non-specific binding.**

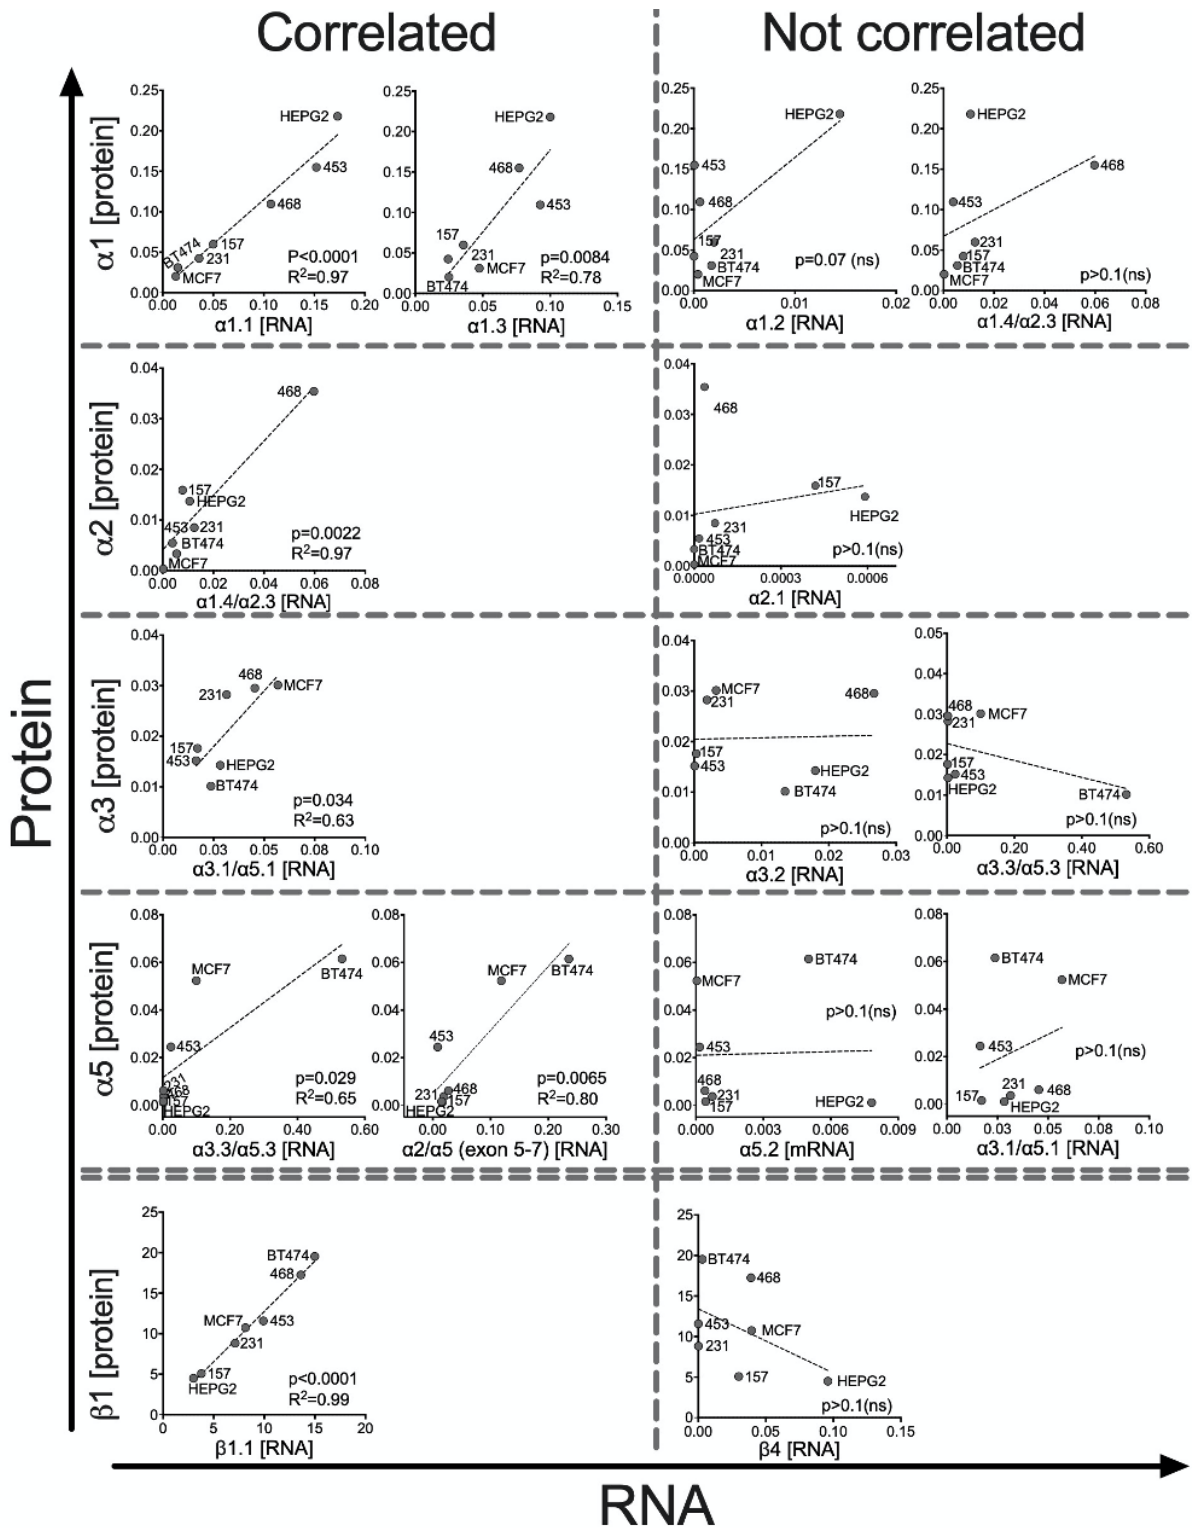

**Supplementary Figure 13. Correlation of LXR transcripts with LXR protein variants in cell lines. Related to Figure 1.** RNA and protein normalised to HPRT levels, and significance tested for using linear regression. Circles represent mean of 3-5 separate passage of each cell line. P-values and R-squared ( $R^2$ ) are shown in each graph. NS = not significant.

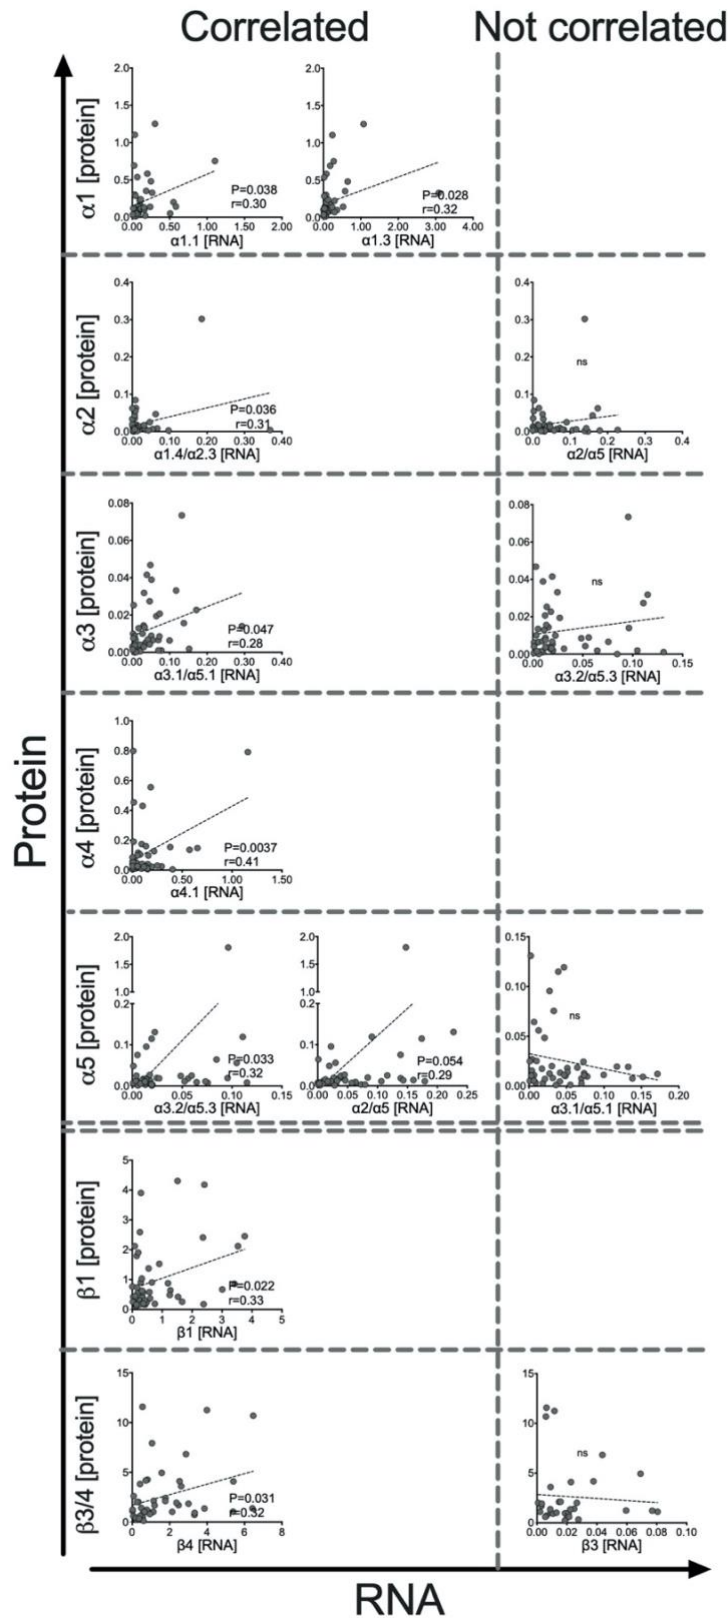

**Supplementary Figure 14. Correlation of LXR transcripts with LXR protein variants in TNBC tumours. Related to Figure 1.** RNA and protein normalised to HPRT levels, and significance tested for using linear regression. Circles represent mean of two different tumour slices from one TNBC tumour samples. P-values and R-squared ( $R^2$ ) are shown in each graph. NS = not significant.

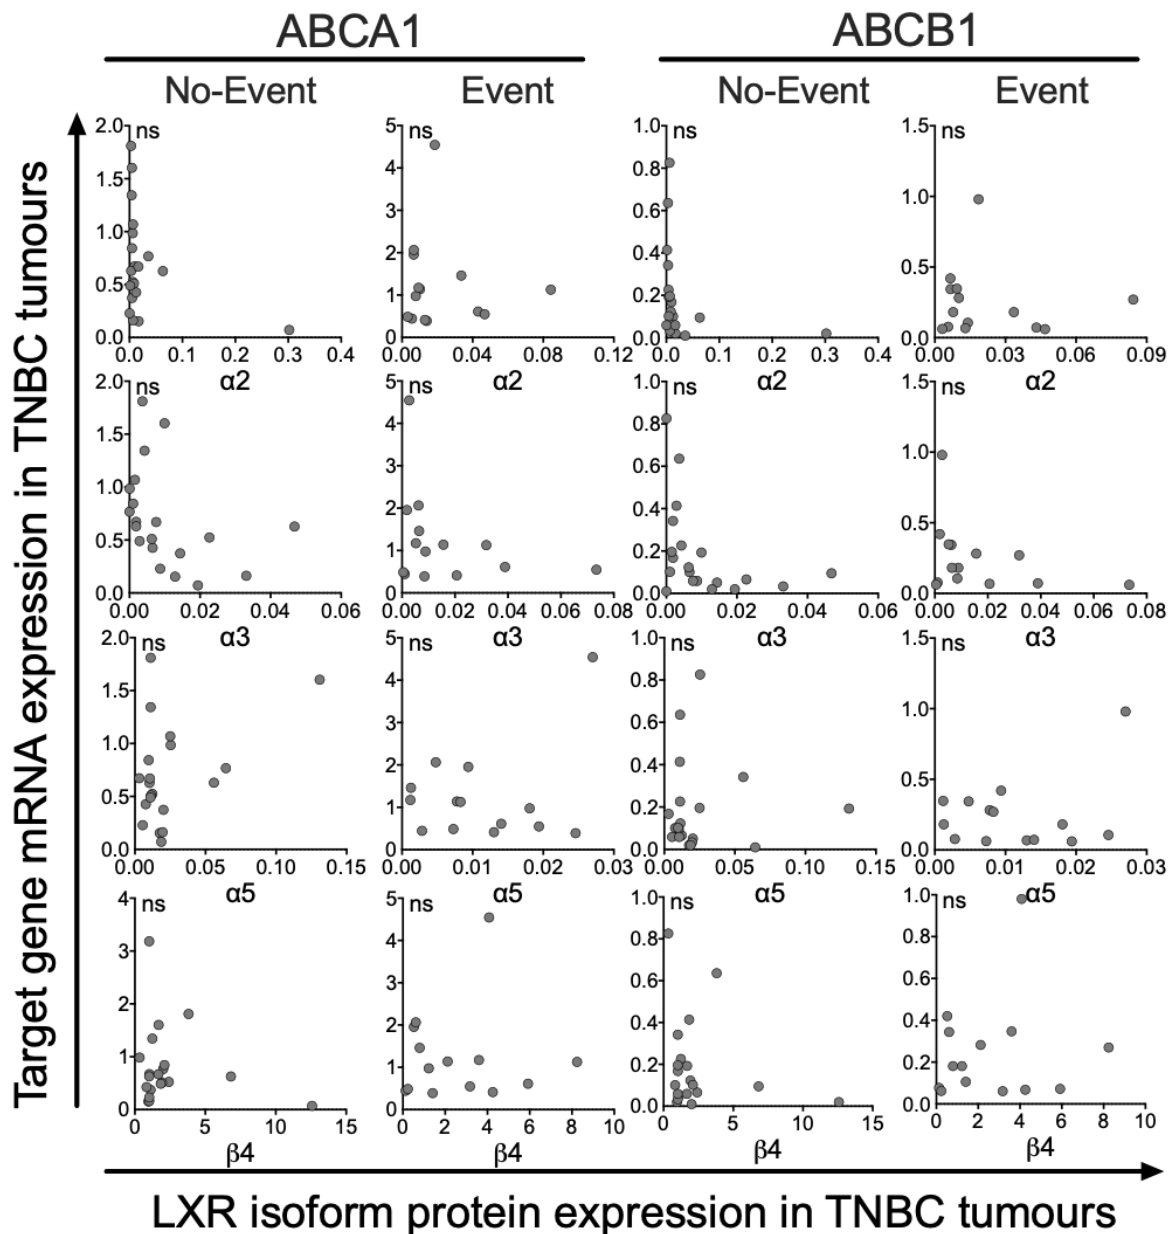

**Supplementary Figure 15. LXR $\alpha 2$ ,  $\alpha 3$ ,  $\alpha 5$ , and  $\beta 4$  protein were not correlated to target genes. Related to Figure 5.** TNBC patients (n=38) were divided into two groups, no event (n=23) and event (n=15), based on their disease-free survival status. LXR $\alpha$  or LXR $\beta$  protein variants at x axis versus (A) ABCA1 or (B) ABCB1 gene expression levels at y axis in TNBC tumours were normalised for HPRT levels and correlated using linear regression. Circles represent individual TNBC samples from the mean of two different tumour slices. Significance levels were set at p-values  $\leq 0.05$ .



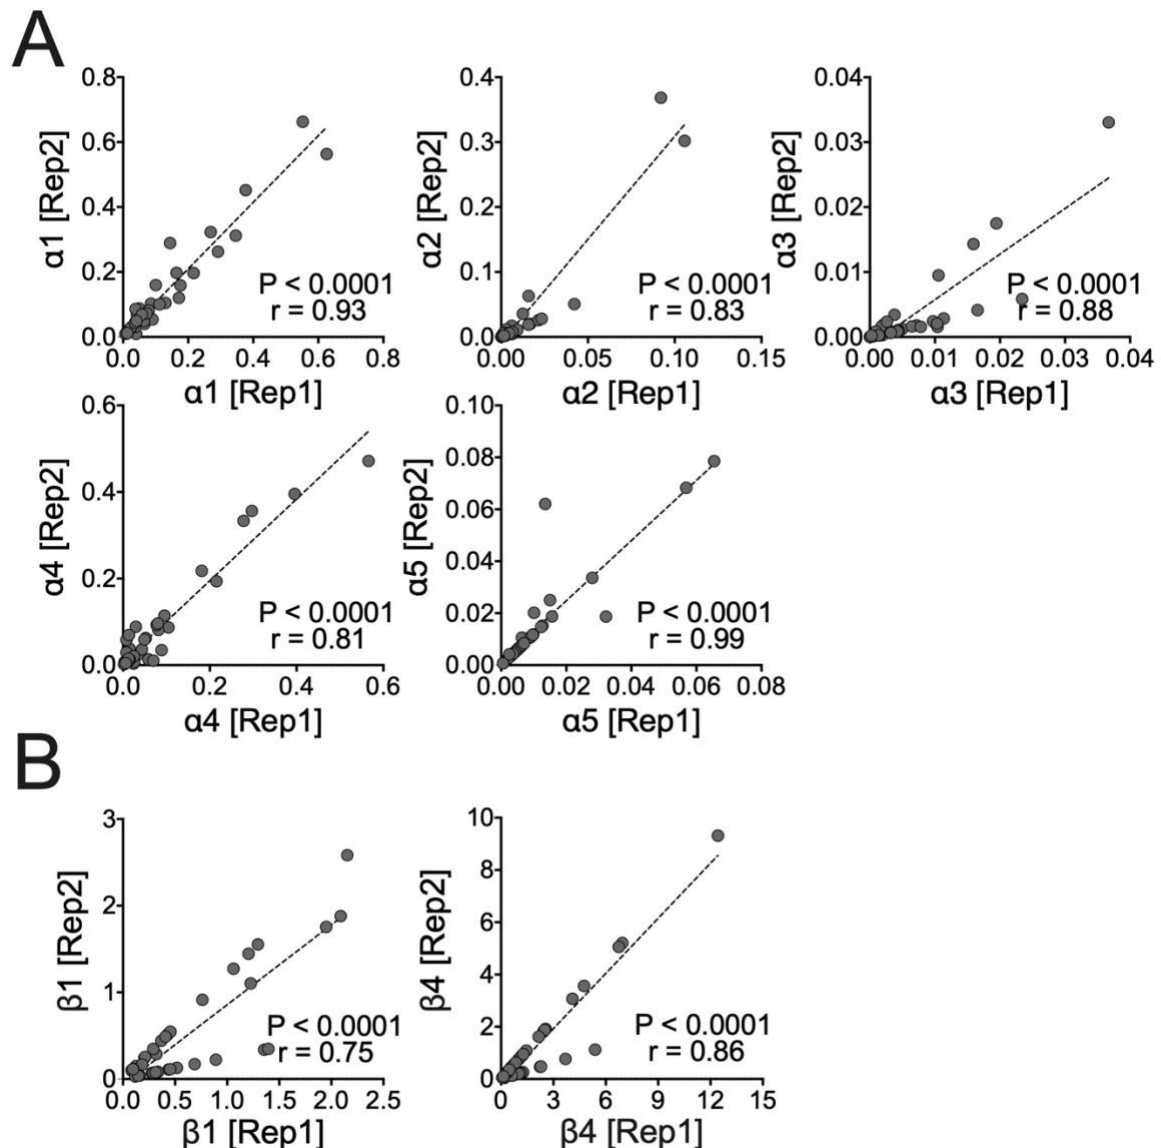

**Supplementary Figure 16. Correlation between two slices of each tumour sample when measuring LXR protein variant expression. Related to Figure 4.** LXR $\alpha$  (A) or LXR $\beta$  (B) protein variant expression of tumour replicate 1 (x axis) is plotted against replicate 2 (y axis). Replicate 1 and 2 were assigned randomly. Samples were derived from the same TNBC tumour sample, normalised by HPRT expression level, and expression correlated using Interclass correlation coefficient through Spearman's rank [1]. Circles represented individual TNBC samples patients. Significance was considered when  $p \leq 0.05$ .

**Table S1. The summary information of the different name used for LXR $\alpha$  splice variants. Related to Figure 1.**

| This study: protein designation | NCBI protein designation                             | This study: transcript designation           | NCBI nucleotide Ref. Seq. Hyperlinked                                                                                                                                                                                                      | NCBI protein Ref. Seq. Hyperlinked                                                                                                                                                                                                         | ENSEMBL ID | TSVdb ID                            | UNIPROT ID | Year of publication (doi): hyperlinked                                                                                                                                                                               | Previous designation | Total amino acids | Size (kDa) | Notes                                                                    |
|---------------------------------|------------------------------------------------------|----------------------------------------------|--------------------------------------------------------------------------------------------------------------------------------------------------------------------------------------------------------------------------------------------|--------------------------------------------------------------------------------------------------------------------------------------------------------------------------------------------------------------------------------------------|------------|-------------------------------------|------------|----------------------------------------------------------------------------------------------------------------------------------------------------------------------------------------------------------------------|----------------------|-------------------|------------|--------------------------------------------------------------------------|
| LXR $\alpha$ 1                  | LXR $\alpha$ isoform 1                               | $\alpha$ 1.1                                 | <a href="#">NM_005693.4</a>                                                                                                                                                                                                                | <a href="#">NP_005684.2</a>                                                                                                                                                                                                                | NR1H3-211  | uc009ylm                            | Q13133-1   | 1995 ( <a href="#">10.1101/gad.9.9.1033</a> );<br>2005 ( <a href="#">10.1194/jlr.M500157-JLR200</a> );<br>2012 ( <a href="#">10.1124/mol.111.077206</a> ); 2014 ( <a href="#">10.1016/j.fertnstert.2014.04.033</a> ) | LXR $\alpha$ 1       | 447               | 50.41      | Detected by PCR and immunoblotting                                       |
|                                 | LXR $\alpha$ isoform X5*<br>LXR $\alpha$ isoform X5* | $\alpha$ 1.2<br>$\alpha$ 1.3<br>$\alpha$ 1.4 | <a href="#">XM_005252706.1</a><br><a href="#">XM_011519805.2</a>                                                                                                                                                                           | <a href="#">XP_005252763.1</a><br><a href="#">XP_011518107.1</a>                                                                                                                                                                           | NR1H3-217  | uc001nem                            |            |                                                                                                                                                                                                                      |                      |                   |            | X5 shares 100% amino acid homology                                       |
| LXR $\alpha$ 2                  | LXR $\alpha$ isoform 2                               | $\alpha$ 2.1                                 | <a href="#">NM_001130101.3</a>                                                                                                                                                                                                             | <a href="#">NP_001123573.1</a>                                                                                                                                                                                                             | NR1H3-203  | uc001nen                            | Q13133-2   | 2005 ( <a href="#">10.1194/jlr.M500157-JLR200</a> );<br>2012 ( <a href="#">10.1124/mol.111.077206</a> ); 2014 ( <a href="#">10.1016/j.fertnstert.2014.04.033</a> )                                                   | LXR $\alpha$ 3       | 387               | 43.56      | Detected by PCR and immunoblotting                                       |
|                                 | LXR $\alpha$ isoform X11*                            | $\alpha$ 2.2<br>$\alpha$ 2.3                 | <a href="#">XM_005252713.3</a>                                                                                                                                                                                                             | <a href="#">XP_005252770.1</a>                                                                                                                                                                                                             | NR1H3-204  | X11 shares 100% amino acid homology |            |                                                                                                                                                                                                                      |                      |                   |            |                                                                          |
| LXR $\alpha$ 3                  | LXR $\alpha$ isoform 3                               | $\alpha$ 3.1                                 | <a href="#">NM_001130102.3</a>                                                                                                                                                                                                             | <a href="#">NP_001123574.1</a>                                                                                                                                                                                                             | NR1H3-201  | uc001nek                            | Q13133-3   | 2005 ( <a href="#">10.1194/jlr.M500157-JLR200</a> );<br>2012 ( <a href="#">10.1124/mol.111.077206</a> ); 2014 ( <a href="#">10.1016/j.fertnstert.2014.04.033</a> )                                                   | LXR $\alpha$ 2       | 402               | 45.69      | Detected by PCR and immunoblotting                                       |
|                                 | LXR $\alpha$ isoform X2*                             | $\alpha$ 3.2                                 | <a href="#">XM_024448289.1</a>                                                                                                                                                                                                             | <a href="#">XP_024304057.1</a>                                                                                                                                                                                                             |            |                                     |            |                                                                                                                                                                                                                      |                      |                   |            | X2 shares 100% amino acid homology                                       |
|                                 | LXR $\alpha$ isoform X2*                             | $\alpha$ 3.3                                 | <a href="#">XM_024448298.1</a>                                                                                                                                                                                                             | <a href="#">XP_024304066.1</a>                                                                                                                                                                                                             |            |                                     |            |                                                                                                                                                                                                                      |                      |                   |            |                                                                          |
| LXR $\alpha$ 4                  | LXR $\alpha$ isoform 4                               | $\alpha$ 4.1                                 | <a href="#">NM_001251934.1</a>                                                                                                                                                                                                             | <a href="#">NP_001238863.1</a>                                                                                                                                                                                                             | NR1H3-235  | uc010rhk                            | B4DXU5     |                                                                                                                                                                                                                      |                      | 435               | 51.11      | Detected by PCR, immunoblotting and MS by unique peptide                 |
|                                 | LXR $\alpha$ isoform 4                               | $\alpha$ 4.2                                 | <a href="#">NM_001251935.1</a>                                                                                                                                                                                                             | <a href="#">NP_001238864.1</a>                                                                                                                                                                                                             |            | uc009yll                            |            |                                                                                                                                                                                                                      |                      |                   |            |                                                                          |
| LXR $\alpha$ 5                  | LXR $\alpha$ isoform 5                               | $\alpha$ 5.1<br>$\alpha$ 5.2                 | <a href="#">NM_001363595.2</a>                                                                                                                                                                                                             | <a href="#">NP_001350524.1</a>                                                                                                                                                                                                             | NR1H3-202  |                                     | B5MBY7     |                                                                                                                                                                                                                      |                      | 342               | 38.85      | Detected by PCR and immunoblotting<br>X7 shares 100% amino acid homology |
|                                 | LXR $\alpha$ isoform X7*                             | $\alpha$ 5.3                                 | <a href="#">XM_011519806.1</a>                                                                                                                                                                                                             | <a href="#">XP_011518108.1</a>                                                                                                                                                                                                             |            |                                     |            |                                                                                                                                                                                                                      |                      |                   |            |                                                                          |
| XP_02430405X                    | LXR $\alpha$ isoform X1                              | XM_02444828X                                 | <a href="#">XM_024448284.1</a><br><a href="#">XM_024448285.1</a><br><a href="#">XM_024448286.1</a><br><a href="#">XM_024448287.1</a><br><a href="#">XM_024448288.1</a>                                                                     | <a href="#">XP_024304052.1</a><br><a href="#">XP_024304053.1</a><br><a href="#">XP_024304054.1</a><br><a href="#">XP_024304055.1</a><br><a href="#">XP_024304056.1</a>                                                                     |            |                                     |            | <a href="#">2012 (10.1124/mol.111.077206)</a>                                                                                                                                                                        | LXR $\alpha$ 4       | 511               | 57.53      | Not detected                                                             |
| XP_0243040XX                    | LXR $\alpha$ isoform X3                              | XM_024448XXX                                 | <a href="#">XM_024448290.1</a><br><a href="#">XM_024448291.1</a><br><a href="#">XM_024448292.1</a><br><a href="#">XM_024448293.1</a><br><a href="#">XM_024448294.1</a><br><a href="#">XM_024448295.1</a><br><a href="#">XM_024448300.1</a> | <a href="#">XP_024304058.1</a><br><a href="#">XP_024304059.1</a><br><a href="#">XP_024304060.1</a><br><a href="#">XP_024304061.1</a><br><a href="#">XP_024304062.1</a><br><a href="#">XP_024304063.1</a><br><a href="#">XP_024304068.1</a> | NR1H3-221  |                                     | E9PLL4     |                                                                                                                                                                                                                      |                      | 466               | 52.81      | Not detected                                                             |
| XP_02430406X                    | LXR $\alpha$ isoform X4                              | XM_02444829X                                 | <a href="#">XM_024448296.1</a><br><a href="#">XM_024448299.1</a>                                                                                                                                                                           | <a href="#">XP_024304064.1</a><br><a href="#">XP_024304067.1</a>                                                                                                                                                                           |            |                                     |            |                                                                                                                                                                                                                      |                      | 377               | 42.64      | Not detected                                                             |
| <a href="#">XP_024304065.1</a>  | LXR $\alpha$ isoform X6                              | <a href="#">XM_024448297.1</a>               | <a href="#">XM_024448297.1</a>                                                                                                                                                                                                             | <a href="#">XP_024304065.1</a>                                                                                                                                                                                                             |            |                                     |            |                                                                                                                                                                                                                      |                      | 422               | 47.34      | Not detected                                                             |
| <a href="#">XP_016872545.1</a>  | LXR $\alpha$ isoform X8                              | <a href="#">XM_017017056.1</a>               | <a href="#">XM_017017056.1</a>                                                                                                                                                                                                             | <a href="#">XP_016872545.1</a>                                                                                                                                                                                                             |            |                                     |            |                                                                                                                                                                                                                      |                      | 332               | 37.25      | Not measured (no unique exon-exon boundaries)                            |
| <a href="#">XP_016872546.1</a>  | LXR $\alpha$ isoform X9                              | <a href="#">XM_017017057.1</a>               | <a href="#">XM_017017057.1</a>                                                                                                                                                                                                             | <a href="#">XP_016872546.1</a>                                                                                                                                                                                                             |            |                                     |            |                                                                                                                                                                                                                      |                      | 323               | 36.26      | Detected by PCR                                                          |
| <a href="#">XP_011518109.1</a>  | LXR $\alpha$ isoform X10                             | <a href="#">XM_011519807.1</a>               | <a href="#">XM_011519807.1</a>                                                                                                                                                                                                             | <a href="#">XP_011518109.1</a>                                                                                                                                                                                                             |            |                                     |            |                                                                                                                                                                                                                      |                      | 313               | 35.52      | Not measured (no unique exon-exon boundaries)                            |
| <a href="#">XP_024304070.1</a>  | LXR $\alpha$ isoform X12                             | <a href="#">XM_024448302.1</a>               | <a href="#">XM_024448302.1</a>                                                                                                                                                                                                             | <a href="#">XP_024304070.1</a>                                                                                                                                                                                                             |            |                                     |            |                                                                                                                                                                                                                      |                      | 299               | 34.44      | Detected by PCR                                                          |
| <a href="#">XP_005252775.1</a>  | LXR $\alpha$ isoform X13                             | <a href="#">XM_005252718.3</a>               | <a href="#">XM_005252718.3</a>                                                                                                                                                                                                             | <a href="#">XP_005252775.1</a>                                                                                                                                                                                                             |            |                                     |            |                                                                                                                                                                                                                      |                      | 253               | 28.68      | Not measured (no unique exon-exon boundaries)                            |
| <a href="#">XP_011518110.1</a>  | LXR $\alpha$ isoform X14                             | <a href="#">XM_011519808.2</a>               | <a href="#">XM_011519808.2</a>                                                                                                                                                                                                             | <a href="#">XP_011518110.1</a>                                                                                                                                                                                                             |            |                                     |            |                                                                                                                                                                                                                      |                      | 235               | 27.32      | Detected by PCR                                                          |

|        |           |                                                                                                                                                                                                              |                                             |     |       |                                               |
|--------|-----------|--------------------------------------------------------------------------------------------------------------------------------------------------------------------------------------------------------------|---------------------------------------------|-----|-------|-----------------------------------------------|
| E9P1D2 | NR1H3-230 | NR1H3-230                                                                                                                                                                                                    | E9P1D2                                      | 296 | 34.14 | Not measured (no unique exon-exon boundaries) |
| C9JBS2 | NR1H3-208 | NR1H3-208                                                                                                                                                                                                    | C9JBS2                                      | 212 | 23.10 | Not measured (no unique exon-exon boundaries) |
| C9JCS0 | NR1H3-213 | NR1H3-213                                                                                                                                                                                                    | C9JCS0                                      | 205 | 22.38 | Not measured (no unique exon-exon boundaries) |
| C9JJ16 | NR1H3-209 | NR1H3-209                                                                                                                                                                                                    | C9JJ16                                      | 202 | 22.04 | Not measured (no unique exon-exon boundaries) |
| C9J4RO | NR1H3-212 | NR1H3-212                                                                                                                                                                                                    | C9J4RO                                      | 193 | 21.10 | Not measured (no unique exon-exon boundaries) |
| E9PPA1 | NR1H3-233 | NR1H3-233                                                                                                                                                                                                    | E9PPA1                                      | 167 | 18.55 | Not measured (no unique exon-exon boundaries) |
| C9J2C8 | NR1H3-205 | NR1H3-205                                                                                                                                                                                                    | C9J2C8                                      | 134 | 14.79 | Not measured (no unique exon-exon boundaries) |
| C9JTS4 | NR1H3-214 | NR1H3-214                                                                                                                                                                                                    | C9JTS4                                      | 77  | 7.82  | Not measured                                  |
| C9JEC2 | NR1H3-210 | NR1H3-210                                                                                                                                                                                                    | C9JEC2                                      | 68  | 6.86  | Not measured                                  |
| F8WC63 | NR1H3-207 | NR1H3-207                                                                                                                                                                                                    | F8WC63                                      | 114 | 12.29 | Not measured (non-sense mediated decay)       |
| F8WEC6 | NR1H3-206 | NR1H3-206                                                                                                                                                                                                    | F8WEC6                                      | 54  | 5.71  | Not measured (non-sense mediated decay)       |
|        |           | NR1H3-215<br>NR1H3-218<br>NR1H3-219<br>NR1H3-226<br>NR1H3-228<br>NR1H3-229<br>NR1H3-231<br>NR1H3-232<br>NR1H3-234<br>NR1H3-216<br>NR1H3-220<br>NR1H3-222<br>NR1H3-223<br>NR1H3-224<br>NR1H3-225<br>NR1H3-227 | Processed transcripts [no protein produced] |     |       |                                               |

**Table S2. The summary information of the different name used for LXR $\beta$  splice variants. Related to Figure 1.**

| This study: protein designation   | NCBI protein designation | This study: transcript designation | NCBI nucleotide Ref. Seq. Hyperlinked | NCBI protein Ref. Seq. Hyperlinked | ENSEMBL ID | TSVdb ID | UNIPROT ID                                  | Year of publication (doi): hyperlinked                                                                | Previously published designation | Total amino acids | Size (kDa) | Notes                                         |
|-----------------------------------|--------------------------|------------------------------------|---------------------------------------|------------------------------------|------------|----------|---------------------------------------------|-------------------------------------------------------------------------------------------------------|----------------------------------|-------------------|------------|-----------------------------------------------|
| LXR $\beta$ 1                     | LXR $\beta$ isoform 1    | $\beta$ 1.1                        | <a href="#">NM_007121.7</a>           | <a href="#">NP_009052.4</a>        | NR1H2-201  | uc010enw | P55055-1                                    | <a href="#">1995(10.1101/gad.9.9.1033);</a><br><a href="#">2014(10.1016/j.fertnstert.2014.04.033)</a> | LXR $\beta$                      | 460               | 50.97      | Detected by PCR and immunoblotting            |
|                                   |                          | $\beta$ 1.2                        |                                       |                                    | NR1H2-214  |          |                                             | Not detected                                                                                          |                                  |                   |            |                                               |
|                                   |                          | $\beta$ 1.3                        | <a href="#">XM_005252706.1</a>        | <a href="#">XP_005252763.1</a>     | NR1H2-204  |          |                                             |                                                                                                       |                                  |                   |            |                                               |
| LXR $\beta$ 2                     | LXR $\beta$ isoform 2    | $\beta$ 2                          | <a href="#">NM_001256647.3</a>        | <a href="#">NP_001243576.2</a>     | NR1H2-202  | uc002psa | P55055-2                                    |                                                                                                       |                                  | 363               | 39.92      | Not detected                                  |
| LXR $\beta$ 3                     |                          | $\beta$ 3                          |                                       |                                    | NR1H2-210  |          | M0R0K3                                      |                                                                                                       |                                  | 430               | 47.56      | Detected by PCR                               |
| LXR $\beta$ 4                     |                          | $\beta$ 4                          |                                       |                                    | NR1H2-211  |          | M0R2F9                                      |                                                                                                       |                                  | 416               | 45.98      | Detected by PCR and immunoblotting            |
| M0QYE6                            |                          | NR1H2-208                          |                                       |                                    | NR1H2-208  |          | M0QYE6                                      |                                                                                                       |                                  | 228               | 24.13      | Not measured (no unique exon-exon boundaries) |
| M0R1V8                            |                          | NR1H2-207                          |                                       |                                    | NR1H2-207  |          | M0R1V8                                      |                                                                                                       |                                  | 209               | 22.24      | Not measured (no unique exon-exon boundaries) |
| M0QZF5                            |                          | NR1H2-209                          |                                       |                                    | NR1H2-209  |          | M0QZF5                                      |                                                                                                       |                                  | 115               | 12.13      | Not measured (no unique exon-exon boundaries) |
| M0R3A7                            |                          | NR1H2-212                          |                                       |                                    | NR1H2-212  |          | M0R3A7                                      |                                                                                                       |                                  | 40                | 3.97       | Not measured (no unique exon-exon boundaries) |
| M0R229 (non-sense mediated decay) |                          | NR1H2-203                          |                                       |                                    | NR1H2-203  |          | M0R229 (non-sense mediated decay)           |                                                                                                       |                                  | 176               | 18.73      | Not measured (non-sense mediated decay)       |
|                                   |                          |                                    |                                       |                                    | NR1H2-213  |          | Processed transcripts [no protein produced] |                                                                                                       |                                  |                   |            |                                               |
|                                   |                          |                                    |                                       |                                    | NR1H2-206  |          |                                             |                                                                                                       |                                  |                   |            |                                               |
|                                   |                          |                                    |                                       |                                    | NR1H2-205  |          |                                             |                                                                                                       |                                  |                   |            |                                               |

**Table S3. TNBC patient tumour characteristics. Related to Figure 4 and Figure 5.**

| Characteristic        | Category            | Leeds Breast Research Tissue Bank<br>No. of patients = 38 (%) |
|-----------------------|---------------------|---------------------------------------------------------------|
| Invasive Tumour grade | 1                   | 0 (0)                                                         |
|                       | 2                   | 3 (8)                                                         |
|                       | 3                   | 35 (92)                                                       |
| Tumour size           | ≤35 mm              | 29 (76)                                                       |
|                       | >35 mm              | 9 (24)                                                        |
| Survival status       | Alive               | 28 (74)                                                       |
|                       | Deceased            | 10 (26)                                                       |
| Recurrence/metastasis | None                | 23 (60)                                                       |
|                       | Local and/or distal | 15 (40)                                                       |

**Table S4. LXR $\alpha$  peptides detected by S-trap column coupled with MS in MDA.MB.468 cell line control samples. Related to Table 1, Table 2, and Table 3.**

Amino acids position number based on LXR $\alpha$ 1. Amino acid numbering position with “-“ indicates the additional amino acid(s) coming before  $\alpha$ 1 and/or  $\beta$ 1's amino acid position number 1.

| Sample                               | Total identified peptides | -10lgP [LXR $\alpha$ ] | Coverage LXR $\alpha$ peptides | Supporting peptides [LXR $\alpha$ ]         | Unique | Amino acids position |     |
|--------------------------------------|---------------------------|------------------------|--------------------------------|---------------------------------------------|--------|----------------------|-----|
|                                      |                           |                        |                                |                                             |        | start                | end |
| MDA.MB.468<br>siCON                  | 4512                      | 42.09                  | 12%                            | KC (+57.02)RQAGMR.E                         | No     | 158                  | 164 |
|                                      |                           |                        |                                | R.EEC(+57.02)VLSEEQIR.L                     | No     | 165                  | 175 |
|                                      |                           |                        |                                | W.PMAPDPHSREAR.Q                            | No     | 239                  | 250 |
|                                      |                           |                        |                                | K.TSAIEVMLETSR.R                            | No     | 292                  | 304 |
|                                      |                           |                        |                                | YN (+.98)PGSESITFLK.D                       | No     | 307                  | 317 |
| MDA.MB.468<br>siLXR $\alpha$         | 3726                      | 37.87                  | 8%                             | R.ASSPPQILPQLSPEQ(+.98)LGMIEK.L             | No     | 196                  | 216 |
|                                      |                           |                        |                                | G.MIEKLVA AQ(+.98)Q(+.98)QC(+57.02)NR.R     | No     | 213                  | 226 |
|                                      |                           |                        |                                | R.AMNELQLN(+.98)DAEFA.L                     | No     | 345                  | 357 |
|                                      |                           |                        |                                | R.M(+15.99)LMKLVSLR.T                       | No     | 407                  | 415 |
| MDA.MB.468<br>siLXR $\beta$          | 3641                      | 44.90                  | 12%                            | A.QGGSSC(+57.02)ILR.E                       | No     | 33                   | 41  |
|                                      |                           |                        |                                | H.SAGGTAGVGL EAA.E                          | No     | 49                   | 61  |
|                                      |                           |                        |                                | L.LTRA EPPSEPT EIRPQ(+.98)K.R               | No     | 67                   | 83  |
|                                      |                           |                        |                                | R.KC(+57.02)RQ(+.98)AGMREEC(+57.02)VLSEEQ.I | No     | 157                  | 173 |
|                                      |                           |                        |                                | R.ASSPPQILPQLSPEQ(+.98)LGMIEK.L             | No     | 196                  | 216 |
|                                      |                           |                        |                                | G.MIEKLVA AQ(+.98)Q(+.98)QC(+57.02)NR.R     | No     | 213                  | 226 |
|                                      |                           |                        |                                | K.LVA AQQQ(+.98)C(+57.02)N(+.98)R.R         | No     | 217                  | 226 |
|                                      |                           |                        |                                | K.AGLQ(+.98)VEFINPIFE.F                     | No     | 329                  | 341 |
|                                      |                           |                        |                                | K.AGLQVEFINPIFEFSR.A                        | No     | 329                  | 344 |
|                                      |                           |                        |                                | Q.VEFINPIFEFSR.A                            | No     | 333                  | 344 |
|                                      |                           |                        |                                | R.M(+15.99)LMKLVSLR.T                       | No     | 407                  | 415 |
| MDA.MB.468<br>treated with<br>GW3965 | 4013                      | 58.14                  | 19%                            | R.ASSPPQILPQLSPEQ(+.98)LGMIEK.L             | No     | 196                  | 216 |
|                                      |                           |                        |                                | R.AMNELQLN(+.98)DAEFA.L                     | No     | 345                  | 357 |
|                                      |                           |                        |                                | R.EDQ(+.98)IALLK.T                          | No     | 284                  | 291 |
|                                      |                           |                        |                                | R.EDQ(+.98)IALLK TSAIE.V                    | No     | 284                  | 296 |
|                                      |                           |                        |                                | R.VTPWPMAPDPHSREARQQ(+.98)R.F               | No     | 235                  | 253 |
|                                      |                           |                        |                                | K.LVA AQQQC(+57.02)NR.R                     | No     | 217                  | 226 |
|                                      |                           |                        |                                | F.TELAIVS.V                                 | No     | 258                  | 264 |

**Table S5. LXR $\beta$  peptides detected by S-trap column coupled with MS in MDA.MB.468 cell line control samples. Related to Table 1, Table 2, and Table 3.**

Amino acids position numbers based on LXR $\beta$ 1. The grey highlight indicated unique peptides of LXR variant detected by MS.

| Sample                               | Total identified peptides | -10lgP [LXR $\beta$ ] | Coverage LXR $\beta$ peptides | Supporting peptides [LXR $\beta$ ]                            | Unique           | Amino acids position |     |
|--------------------------------------|---------------------------|-----------------------|-------------------------------|---------------------------------------------------------------|------------------|----------------------|-----|
|                                      |                           |                       |                               |                                                               |                  | start                | end |
| MDA.MB.468<br>siCON                  | 4512                      | 44.58                 | 17%                           | R.RSVVRGGAR.R                                                 | No               | 113                  | 121 |
|                                      |                           |                       |                               | R.YAC(+57.02)RGGGTC(+57.02)QMDAFM(+15.99)RR.K                 | No               | 123                  | 139 |
|                                      |                           |                       |                               | S.EAGSQSGEGEGVQ(+.98)LTAAQEL.M                                | No               | 205                  | 225 |
|                                      |                           |                       |                               | A.QELMIQ(+.98)Q(+.98)LVAAQLQC(+57.02)NKR.S                    | No               | 223                  | 240 |
|                                      |                           |                       |                               | L.QVEFIN(+.98)PIFEFSRAM(+15.99)R.R                            | No               | 345                  | 360 |
| MDA.MB.468<br>siLXR $\alpha$         | 3726                      | 50.87                 | 18%                           | G.NGPPQPGAPSSSPTVK.E                                          | No               | 16                   | 31  |
|                                      |                           |                       |                               | R.RSVVRGGAR.R                                                 | No               | 113                  | 121 |
|                                      |                           |                       |                               | K.RSFSDQPKVTPWPLGADPQ(+.98)SR.D                               | No               | 240                  | 260 |
|                                      |                           |                       |                               | K.QVPGFLQLGREDQ(+.98) IA                                      | No               | 287                  | 300 |
|                                      |                           |                       |                               | A.KQ(+.98)VPGFLQLGREDQIALLK.A                                 | No               | 286                  | 304 |
|                                      |                           |                       |                               | A.LQQ(+.98)PYVEALLS.Y                                         | No               | 394                  | 404 |
| R.M(+15.99)LMKLVSLR.T                | No                        | 420                   | 428                           |                                                               |                  |                      |     |
| MDA.MB.468<br>siLXR $\beta$          | 3641                      | -                     | 0%                            | -                                                             | -                | -                    | -   |
| MDA.MB.468<br>treated with<br>GW3965 | 4013                      | 58.60                 | 15%                           | G.EGVQLTAAQELMIQ.Q                                            | No               | 215                  | 228 |
|                                      |                           |                       |                               | V.QLTAAQ(+.98)ELMIQ(+.98).Q                                   | No               | 218                  | 228 |
|                                      |                           |                       |                               | G.EGVQ(+.98)LTAAQELMIQ(+.98)Q(+.98)LVAAQLQ(+.98)C(+57.02)NK.R | No               | 215                  | 239 |
|                                      |                           |                       |                               | Q.Q(+.98)LVAAQLQ(+.98)C(+57.02)N(+.98)KR.S                    | No               | 229                  | 240 |
|                                      |                           |                       |                               | R.QQRFAHFTELAISVQ(+.98)E.I                                    | Yes [ $\beta$ 1] | 264                  | 280 |
|                                      |                           |                       |                               | K.QVPGFLQ(+.98)LGR.E                                          | No               | 287                  | 296 |
|                                      |                           |                       |                               | R.EDQ(+.98)IALLK.A                                            | No               | 297                  | 304 |
|                                      |                           |                       |                               | K.RPQDQ(+.98)LR.F                                             | No               | 410                  | 416 |

**Table S6. Primer Sequences of LXR transcripts for qPCR. Related to Figure 3 and Figure 5. \*denotes potential ambiguity in amplicon.**

| LXR transcript             | Forward                   | Reverse                |
|----------------------------|---------------------------|------------------------|
| α1.1                       | TGCTCAGCTCCAGCTCACTG      | AGGCACTGTCCAAATCCCCA   |
| α1.2                       | TCTGGGGAGAAGTGAGGGGT      | CACTTTCCAGGGTCCCAGCA   |
| α1.3                       | CCTATGGAGGGGAGGGAACA      | TGAGCACAAGCAGGACCCAG   |
| α1.4/α2.3                  | AGGAGCATAAGAAGGACAGTGC    | GAGGAATGTCAGGCACAGGG   |
| α2.1                       | CTCAGCCTTTCCCCAAATTGCT    | TACCAAGGCACTGTCCAAATCC |
| α2.2                       | GAGCATAAGAAG-GACAGTGC     | CGCAGAGTCAGGAGGAATGT   |
| α3.1/α5.1*                 | GAAAAGGCGCAGTCTCGGTG      | ACCGCAGAGTCTTCTTATGCT  |
| α3.2/α5.3*                 | CACCGAGACTTCTGGACAGG      | CCACCGCAGAGTCAAATCCC   |
| α3.3                       | GGAGAAATCCCTTACCAAGACTCTG | GCATCCTGGCTTCTCTCTGA   |
| α4.1                       | GCCAAGGTACAGGTAACGAAGC    | TCCTTCTCGGCGTGAACCTG   |
| α4.2                       | AGGTACAGCTTCAGGGAAGTC     | CTCCTTCTCGGCGTGAACCT   |
| α5.2                       | GCTAAGAGCGCTGGACTCTG      | GCATCCTGGCTTCTCTCTGA   |
| α2/α5*                     | GAGTCACGGTGATGCTTCTG      | TGGCAAAGTCTTCCCGGTTA   |
| XM_024448XXX               | GATCGAGGTGGCTGGAGAAG      | AACCTCAAACGGGGACTAGG   |
| XM_02444829X               | CACTCTGCTGGGGTACTG        | GACAGGACACCTGTGGGTTT   |
| XM_017017057               | CATCTTCGAGTTCTCCAGGGC     | GCCAAGCTCTCTCATCCTGC   |
| XM_024448302/ XM_011519808 | AGGAGCATAAGAAGGTGTCCTG    | CAAGGATGTGGCATGAGCCT   |
| Total α                    | TGGAAGCCCTGCATGCCTAC      | ACTTGCTCTGAGTGGACGCT   |
| β1.2                       | CAGTGGGTCTGTGATGAGG       | GGACAGAGCAAGACTTCGTG   |
| β1.3                       | TTAAAGGAGAATGGGCCCTACC    | GGTATCCAGGGAACCTCGTGGT |
| β1                         | CCCAAAGTCACGCCCTGG        | CTTCAGGAGGGCGATCTGG    |
| β2                         | CCCCTTCTTCTTACCCACT       | CTTCAGAAAGGACGCCCC     |
| β3                         | CCCAAAGTCACGGAGATCGT      | CGATAGTGGATGCCTTCAGGA  |
| β4                         | AGGAGTCACAGTCACAGTCG      | CGGCCAGCGTGACTTTG      |
| Total β                    | CGCTACAACCAGAGACAGAGT     | GCGAGAACTCGAAGATGGGGTT |
| HPRT                       | AGGCGAACCTCTCGGCTTTC      | TACTAATCACGACGCCAGGG   |
